# Supplementary material for: Well-crystallized square-like 2D BiOCl nanoplates: mannitol-assisted hydrothermal synthesis and improved visible-light-driven photocatalytic performance
Source: Royal Society of Chemistry journal article supplement (doi:10.1039/c1ra00335f), 2011-01-01

***Supplementary Information***

**for**

**Well-crystallized square-like 2D BiOCl nanoplates: mannitol-assisted hydrothermal  
synthesis and improved visible-light-driven photocatalytic performance**

Jinyan Xiong<sup>‡</sup>, Gang Cheng<sup>‡</sup>, Guangfang Li, Fan Qin, Rong Chen\*

Key Laboratory for Green Chemical Process of Ministry of Education and School of Chemical  
Engineering and Pharmacy, Wuhan Institute of Technology, Xiongchu street, Wuhan, 430073,  
PR China

\* Corresponding author: Prof. R. Chen, E-mail: rchenhku@hotmail.com

Tel.: (+86)13659815698; fax: (+86)2787194465.

<sup>‡</sup> These authors make equal contributions to this work.

**Fig. S1** EDX spectrum of the as-synthesized square-like BiOCl nanoplates. The Cu signal comes from the copper grid.

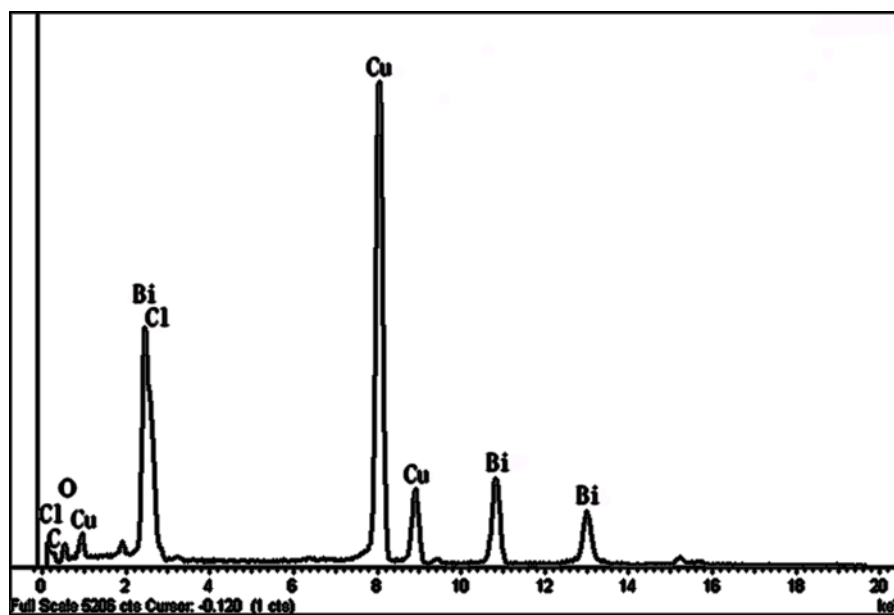

**Fig. S2** SEM image of commercial BiOCl.

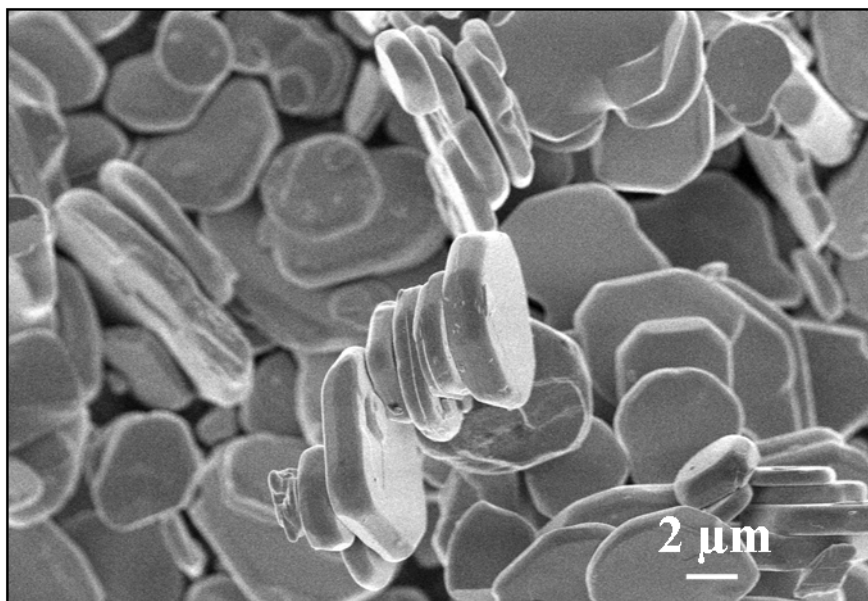

**Fig. S3** The photograph images of 100 mL ( $10^{-5}$  M) RhB solution in the presence of 0.1 g square-like BiOCl nanoplates during adsorption in the dark and under visible light irradiation.

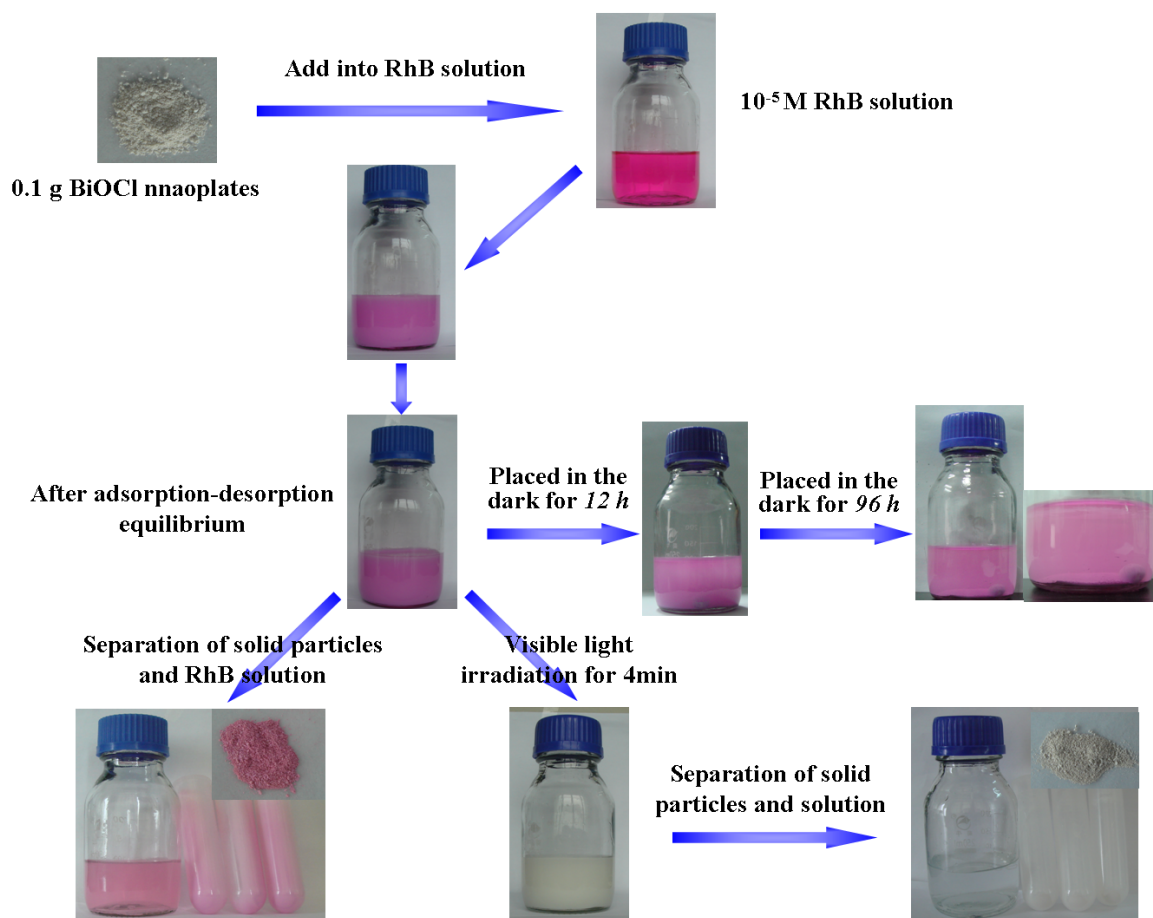

**Fig. S4** XRD patterns of the square-like BiOCl nanoplates before (a) and after (b) photodegradation.

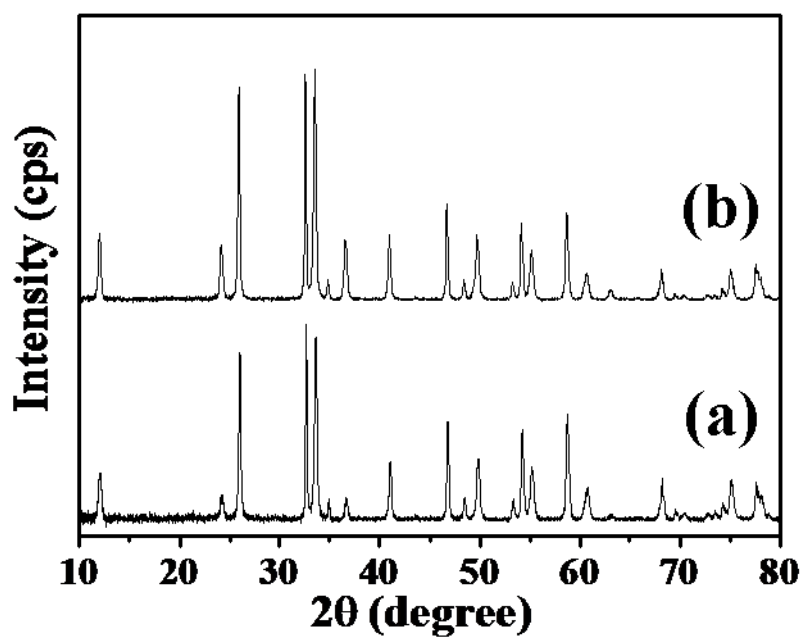

Supplement: c1ra00335f.pdf [file c1ra00335f.pdf]
